# Supplementary material for: Fast Mechanically Driven Daughter Cell Separation Is Widespread in Actinobacteria
Source: PubMed Central journal article supplement (PMC4999543; doi:10.1128/mbio.00952-16), 2016-08-30

A

*Salinicoccus roseus*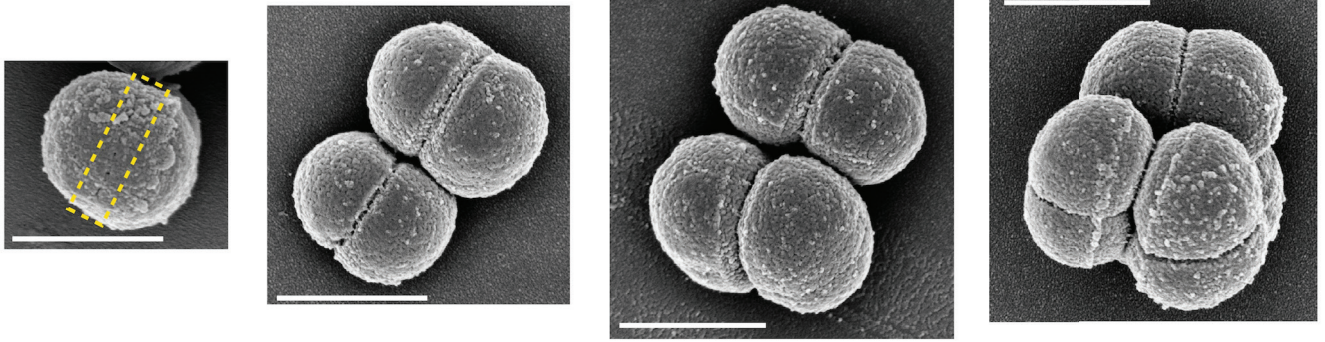

B

*Jeotgalicoccus* sp.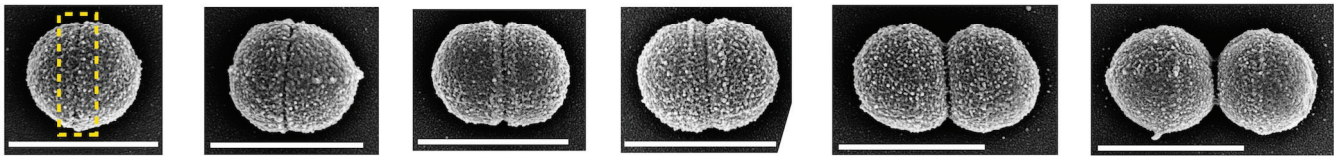

C

*Sporosarcina ureae*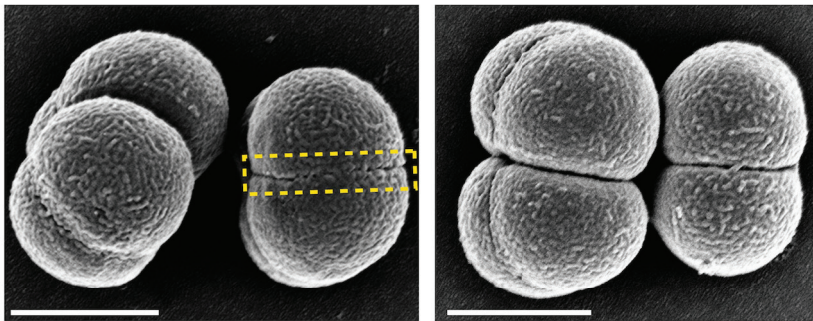

D

*Listeria monocytogenes*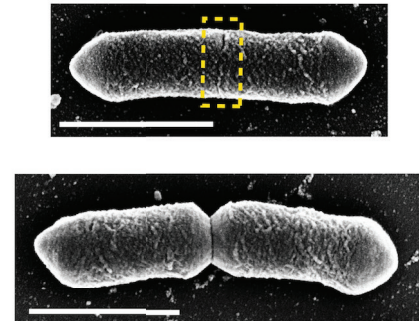

E

*Bacillus subtilis*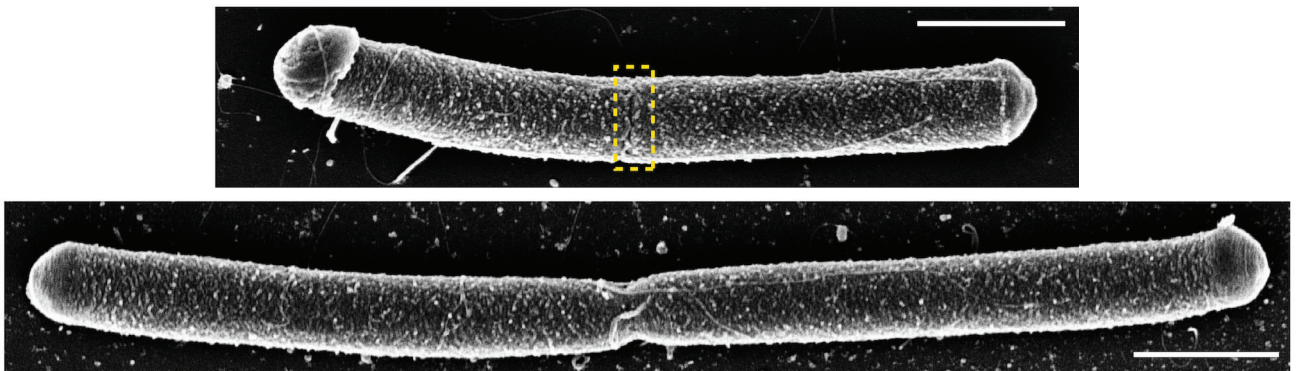

Supplement: mbo004162956sf2.pdf [file mbo004162956sf2.pdf]
