# Supplementary material for: Fast Mechanically Driven Daughter Cell Separation Is Widespread in Actinobacteria
Source: PubMed Central journal article supplement (PMC4999543; doi:10.1128/mbio.00952-16), 2016-08-30

A

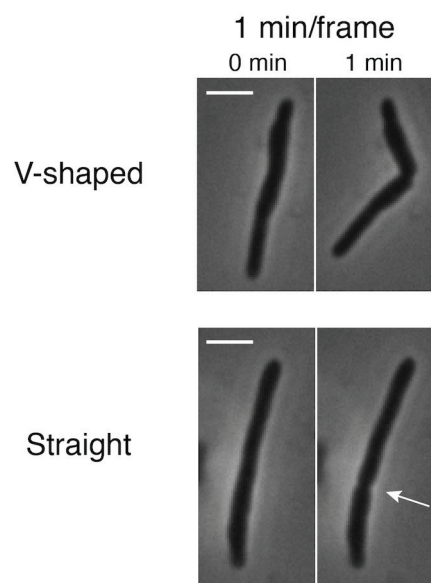

B

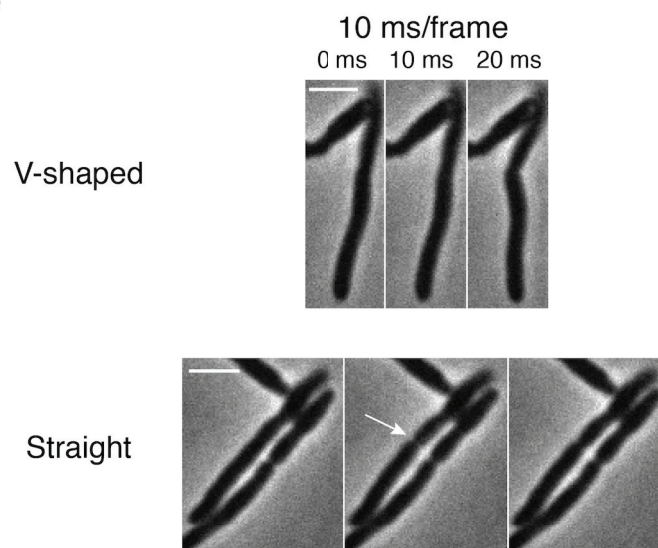

C

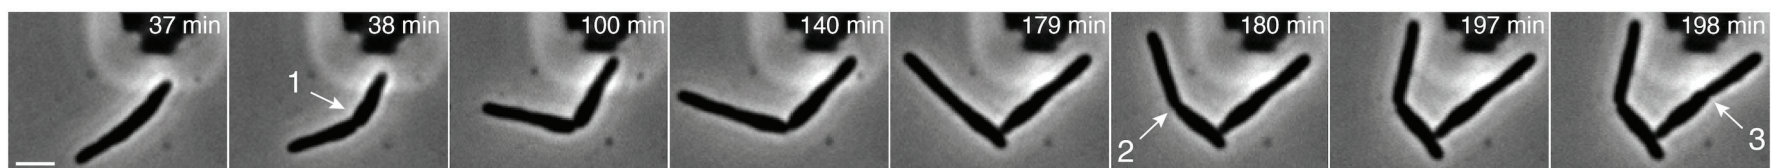

D

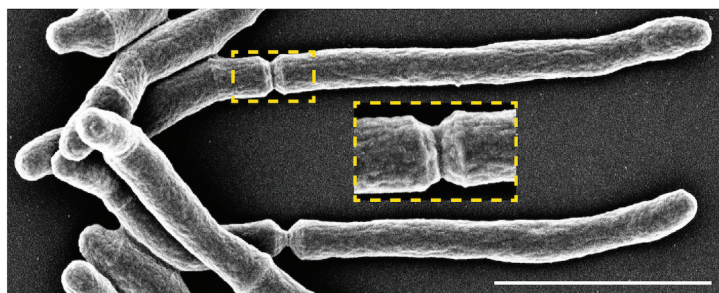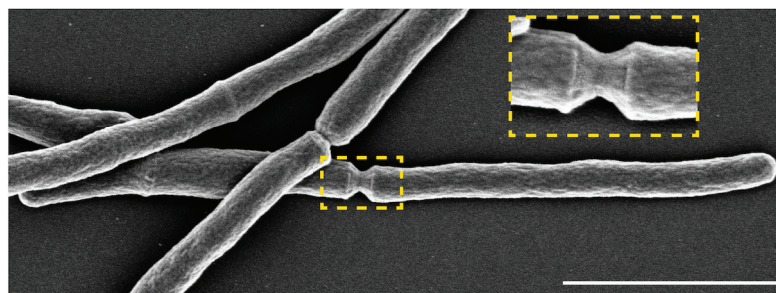

E

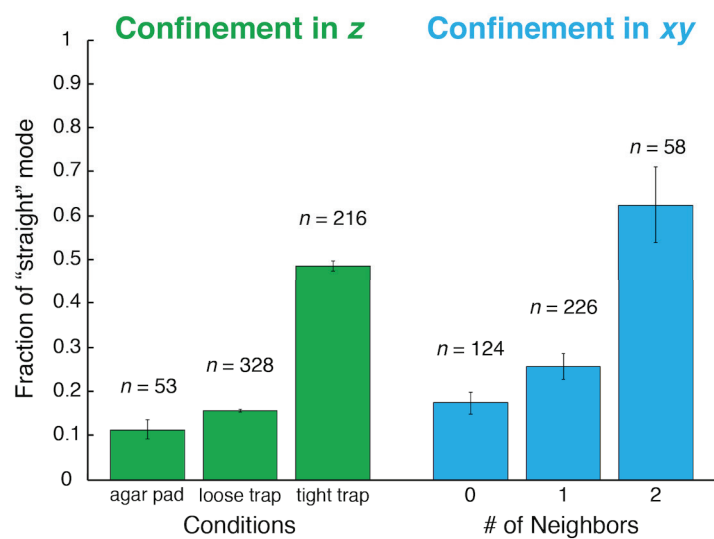

F

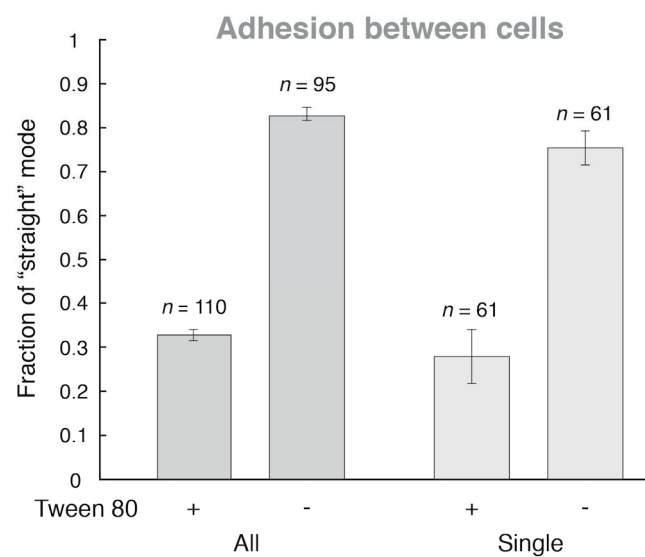

Supplement: mbo004162956sf3.pdf [file mbo004162956sf3.pdf]
