# Supplementary material for: Fast Mechanically Driven Daughter Cell Separation Is Widespread in Actinobacteria
Source: PubMed Central journal article supplement (PMC4999543; doi:10.1128/mbio.00952-16), 2016-08-30

# Gram-negative

# Slow DCS Gram-positive

# Fast DCS Gram-positive

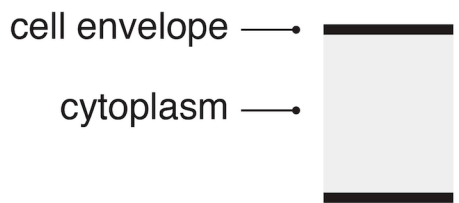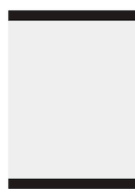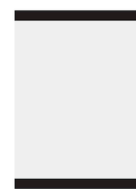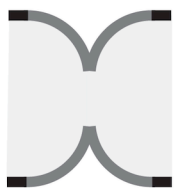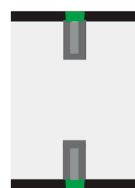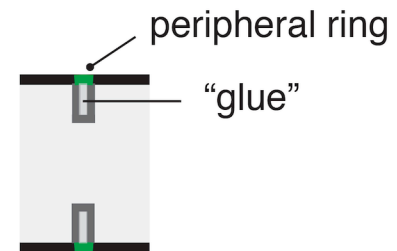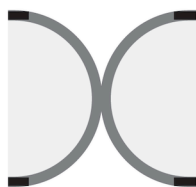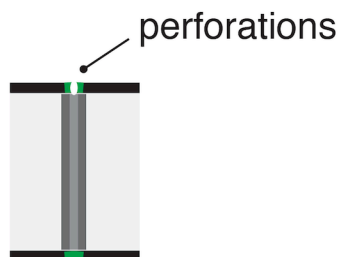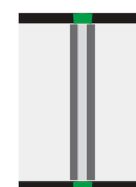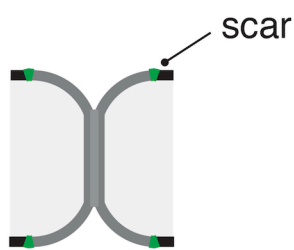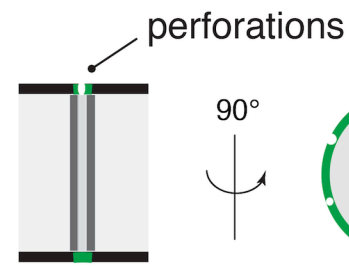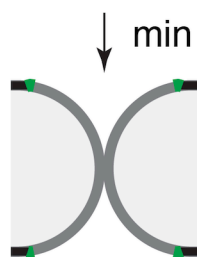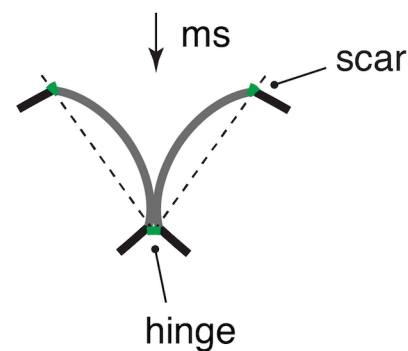

Supplement: mbo004162956sf5.pdf [file mbo004162956sf5.pdf]
